1

## Metabolic life tables: the sockeye salmon example

2

Joseph R. Burger<sup>a,1\*</sup>, Chen Hou<sup>b,1</sup>, Charles A.S Hall<sup>d,1</sup>, and James H. Brown<sup>d,1</sup>

3

4 <sup>a</sup> Institute of the Environment, University of Arizona, Tucson, AZ 85721 USA;

5 [ecoevoburger@email.arizona.edu](mailto:ecoevoburger@email.arizona.edu)

6 <sup>b</sup> Department of Biological Science, Missouri University of Science and Technology, Rolla, MO

7 65409 USA;

8 <sup>c</sup> Department of Environmental and Forest Biology and Program in Environmental Science, State

9 University of New York, – College of Environmental Science and Forestry, Syracuse NY, 13210,

10 USA;

11 <sup>d</sup> Department of Biology, University of New Mexico, Albuquerque, NM 87131 USA

12

13 <sup>1</sup>All authors contributed equally

14

15 Corresponding author: Joseph R. Burger, Institute of the Environment, University of Arizona,

16 Tucson, AZ 85721; [ecoevoburger@email.arizona.edu](mailto:ecoevoburger@email.arizona.edu)

17

18 Key words: life history; demography; energy budget; ecosystem; conservation; sustainable

19 harvest; steady-state; metabolic theory of ecology; population

20

### 21 **Abstract**

22 We resurrect the metabolic life table (MLT), a combination of life table and energy budget that

23 quantifies how metabolic energy is acquired and allocated to survival, growth and reproduction

24 over the life cycle. To highlight its broad implications and utility, we apply this framework to

25 John Brett's classic data on sockeye salmon. In the life cycle of Skeena River sockeye, a pair of

26 breeders dies in fresh water after spawning, and the offspring move to the ocean where they

27 feed, grow and suffer mortality before returning to freshwater and migrating upstream to

28 spawn and die. Most of the accumulated biomass energy is transported into freshwater

29 ecosystems and expended on respiration for migration and breeding or is transferred to

30 consumers. Reanalyzing Brett’s data in the context of a MLT has broad implications and  
31 applications: i) for basic ecology, because of the unusual physiology, life history and ecosystem  
32 impacts of wild salmon; and ii) for conservation and management, because of the enormous  
33 economic importance of wild-caught and farmed salmon. Moreover, the MLT highlights the  
34 intimate relationships between two universal biological processes: i) demography as a function  
35 of age; and ii) metabolism—the balancing of uptake, transformation, and allocation of  
36 metabolic energy over the life cycle. Linking these two universal processes provides a general  
37 MLT framework that can be applied across the diversity of life.

38

### 39 ***Introduction***

40 Empirical and theoretical research on metabolic ecology uses energy as a common  
41 currency to make explicit linkages between ecology, life history and evolution (e.g., Lotka 1922;  
42 Odum & Pinkerton 1955; Hall 1972, 1995; Van Valen 1976; Brown et al. 2004, 2018; Koopijman  
43 and Kooijman 2010; Sibly et al. 2012; Burger et al. 2019). These linkages connect anatomy,  
44 morphology, physiology and behavior at the level of individual organisms to patterns and  
45 processes of ecological organization at population, community and ecosystem levels. They also  
46 have important implications for applied issues in science including conservation, management  
47 and exploitation of animals for human use.

48 Canadian fisheries biologist John “Roly” Brett (1983, 1986) introduced the concept of a  
49 “life table of energetics,” which combines the demographic framework of a traditional life table  
50 with the energy balance framework of physiological ecology. Brett illustrated the conceptual  
51 approach and practical applications using data on sockeye salmon collected over decades of

52 field and laboratory research. Here, we resurrect Brett's seminal ideas in the context of recent  
53 advances in metabolic scaling theory. We compile and reanalyze his data to address theoretical  
54 and empirical, basic and applied problems. We show how updated metabolic life table (MLT)  
55 analysis offers new insights into the fundamental general features of demography and  
56 metabolic ecology that govern the diversity of life (Brown et al. 2018; Burger et al. 2019).  
57 Sockeye salmon provide an exemplary model system for MLT analysis illuminating the keystone  
58 energetic roles of salmon in ecosystems and human economies.

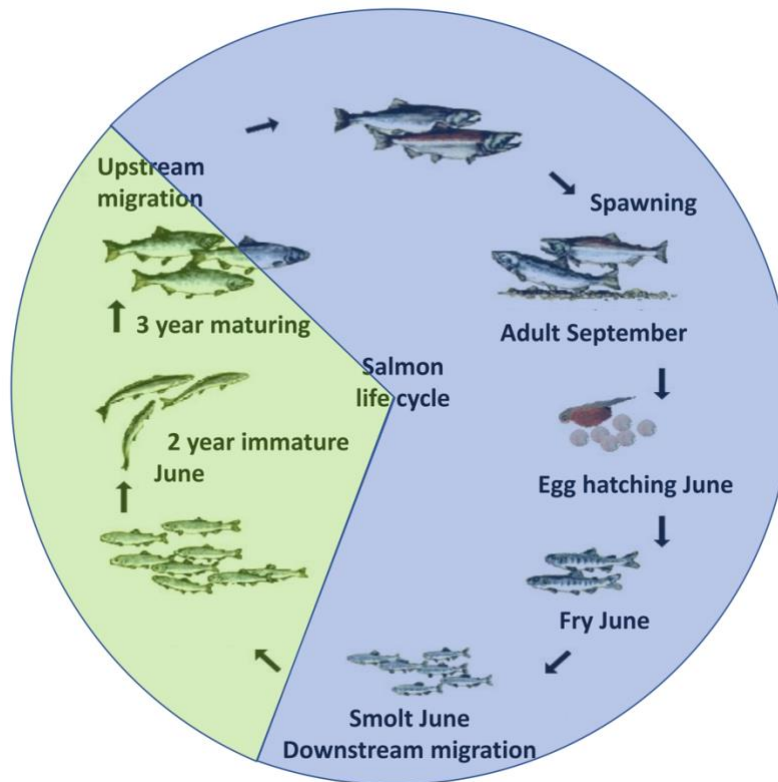

59

60 **Figure 1.** Life cycle of Babine Lake sockeye salmon after Brett (1983). The parts of the life cycle  
61 spent in fresh water and the oceans are indicated by green and blue shading, respectively, but  
62 not to scale; salmon spend nearly equal time, two years, in freshwater and marine  
63 environments. Figure modified from

64 [https://www.google.com/search?q=salmon+life+cycle&rlz=1C1CHFX\\_enUS555US555&source=l](https://www.google.com/search?q=salmon+life+cycle&rlz=1C1CHFX_enUS555US555&source=l)  
65 [nms&tbm=isch&sa=X&ved=0ahUKEwj7rZiC3PXWAhWBLmMKHRiiAM8Q\\_AUICigB&biw=1067&](https://www.google.com/search?q=salmon+life+cycle&rlz=1C1CHFX_enUS555US555&source=l)  
66 [bih=423#imgrc=WiztTrFdqAKvPM.](https://www.google.com/search?q=salmon+life+cycle&rlz=1C1CHFX_enUS555US555&source=l)

67 Brett's seminal 1983 paper "put together a comprehensive estimate of the life  
68 energetics of an average sockeye salmon that commences life as a fertilized egg weighing 0.013  
69 g containing 372 cal ... and terminates growth as a 2,270 g adult containing 4,200 kcal when  
70 entering fresh water on its final journey ... to examine the life energetics in detail—namely, the  
71 Babine Lake sockeye salmon" Brett 1983, p.30). Brett combined a *life table*, which quantifies  
72 changes in the number of individuals with age due to survival and reproduction; and an *energy*  
73 *budget*, which accounts for the flows and stocks as energy is taken up from the environment  
74 and allocated to maintenance (survival), growth and reproduction. Pacific salmon  
75 (*Oncorhynchus spp.*) provide an excellent empirical model organism for two reasons: they have  
76 an unusual life history that facilitates quantification (Fig. 1); and they have been studied  
77 intensively – long prized as food for humans, wild fisheries and aquaculture are worth billions of  
78 dollars (Quinn 2018; [http://www.iser.uaa.alaska.edu/Publications/2013\\_04-The](http://www.iser.uaa.alaska.edu/Publications/2013_04-The)  
79 [EconomicImportanceOfTheBristolBaySalmonIndustry.pdf](http://www.iser.uaa.alaska.edu/Publications/2013_04-The);  
80 [https://en.wikipedia.org/wiki/Aquaculture\\_of\\_salmonids](https://en.wikipedia.org/wiki/Aquaculture_of_salmonids)). Here we reassembly and revive  
81 Brett's "life table of energetics" of sockeye (Brett 1983; Brett 1986; Furnell and Brett 1996) in  
82 the context of recent advancements in metabolic life history theory (Brown et al. 2018; Burger  
83 et al. 2019) in order to demonstrate the practical utility and universality of the approach.

84

85 **Methods**

86           Brett compiled what he called a "Life Table of Energetics" (Brett 1983), which gives data  
87   on body mass and composition, and energy acquisition and expenditure for 33 stages of a  
88   typical four-year life cycle (distilled in Tables 1 and 2). In doing so Brett made some  
89   simplifications and assumptions:

90   1) He assumed that the population was in steady state with reproduction balancing mortality.

91   In the 1970s and early 1980s the Babine Lake sockeye population was relatively stable,  
92   providing a sustainable fishery.

93   2) He assumed a simplified four-year life cycle, ignoring the small proportion of the population  
94   that returned to breed after three or five years.

95   3) He estimated average values for the population as a whole, ignoring variation among  
96   individuals and across years.

97   4) He used laboratory measurements, simplified models, and corrections for environmental  
98   temperature to estimate energy assimilation from feeding and energy expenditure for  
99   maintenance and activity.

100   5) He used additional information from models and other salmon populations to estimate  
101   parameters (e.g., growth and mortality) for the marine stages for which direct measurements  
102   for the Babine Lake population were not available.

103   6) He recognized that many parameters were estimated with some imprecision, so he rounded  
104   off and reported approximate average values.

105           We extended Brett's work and made additional changes. Most notably we used  
106   information on mortality in other papers (Brett 1986; Furnell and Brett 1996) to obtain the age  
107   structure for the 33 stages in Fig. 2. Using these values—and ignoring variation in mortality and

108 standing stocks due to movement at sea and seasonal fluctuations in ocean temperature and  
109 productivity—we put together a MLT for the Babine Lake sockeye population in Table 1. Given  
110 the above assumptions, simplifications, and conversions, our metabolic life tables is a faithful  
111 distillation and synthesis of Brett’s data.

112 The data on survival (number alive) come primarily from Brett (1986), which reports estimates  
113 for seven approximately yearly intervals derived from a combination of field measurements and  
114 demographic models. We interpolated between these values to estimate survival at monthly  
115 intervals.

116

### 117 ***Metabolic ecology of sockeye salmon***

#### 118 *Natural history of the life cycle*

119 Salmon are: 1) anadromous – breeding in fresh water and growing in the ocean, and 2)  
120 semelparous – making a single, end-of-life reproductive effort. The life cycle (Fig. 1) starts in  
121 September when the mature adults have returned to spawn in tributary streams of Babine  
122 Lake. The average female lays about 3,000 eggs, each weighing 0.013 g. Males fertilize the eggs  
123 as females deposit them in the streambed. The eggs are buried in gravel and develop over the  
124 winter. In June about 600 survivors hatch, move to the lake, and feed on plankton. After one  
125 year about 84 surviving smolts, each weighing ~5.4 g, migrate downstream and enter the  
126 ocean. During the marine phase of the life cycle, which lasts a little more than two years,  
127 juveniles move substantial distances between water masses of varying temperature and  
128 productivity, feed voraciously on zooplankton, grow rapidly, and accumulate stores of energy-  
129 rich lipids and proteins in their distinctive red flesh. In the summer of their fourth year, the

130 maturing adults weigh about 2700 g when they return to coastal waters, stop feeding, and start  
131 their upstream migration. By September, they reach the spawning grounds, where females  
132 compete to excavate nests in the streambed and males compete to mate with spawning  
133 females. Both sexes die after spawning, leaving a clutch of eggs and depleted carcasses, having  
134 expended most of their body energy for migration and mating.

135 *Life table: survival and reproduction*

136 The complete MLT is presented in Table 1. The first few columns provide a traditional  
137 life table: a schedule of survival and reproduction as a function of age, stage and body mass.  
138 Each generation starts with 3,000 eggs, lasts four years, and ends with another 3,000 eggs  
139 spawned by two depleted breeders. In between the eggs hatch, the offspring grow and die as  
140 they age, and an average of two survive to breed and continue the life cycle. The dynamics of  
141 the life history as a function of age are shown in Fig. 2. Until the salmon stop feeding and enter  
142 fresh water for the return migration, cumulative assimilation, respiration and biomass increase  
143 with age; deviations from smooth monotonic curves reflect variations in energy income  
144 (assimilation from feeding) and expenditure (respiration for swimming) and associated  
145 variation in temperature (Brett 1972; 1983; Brett and Glass 1973). During the last three months  
146 of life, the returning adults use up most of their stored body energy on locomotor and  
147 reproductive activity, leaving depleted carcasses and a new clutch of eggs.

148

149

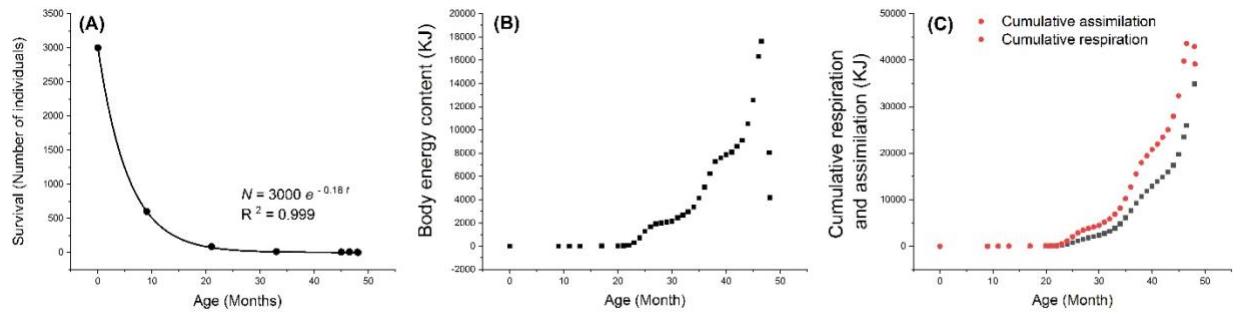

150

151 **Figure 2.** Dynamics of Babine Lake salmon life history and energetics: variation as a function of

152 age. (A) Survival: number alive out of initial clutch of 3,000 eggs. Deviations from the fitted

153 exponential relationship are too small to show on this graph. (B) Body energy content. (C)

154 Cumulative respiration and assimilation.

155

156 *Metabolism: body mass and temperature dependence of respiration, growth and assimilation.—*

157 The MLT (Table 1) documents variation in rates of respiration, growth and assimilation with

158 age, stage, body mass and environmental temperature at monthly intervals over one

159 generation. We compare these data to predictions from general metabolic theory (Peters 1983;

160 Calder 1984; Schmidt-Nielsen 1984; Brown et al. 2004; Sibly et al. 2012). Whole-organism rates,

161  $B$ , characteristically increase with body mass,  $m$ , scaling as power laws of the form

$$162 \quad B = B_0 m^\alpha \quad 1$$

163 where  $B_0$  is a normalization constant, and the exponent  $\alpha$  is characteristically close to 3/4 for

164 respiration rate and most other whole-organism rates (e.g., Kleiber 1932; Peters 1983; Calder

165 1984; Schmidt-Nielsen 1984; West et al. 1997; Brown et al. 2004; Sibly et al. 2012). In

166 ectothermic animals, such as salmon, these rates also vary with body temperature with  $Q_{10} \approx$



167 2.5 (increasing ~2.5 times for every 10°C increase in temperature (e.g., Gillooly et al. 2001;  
168 Huey and Kingsolver 2019)).

169

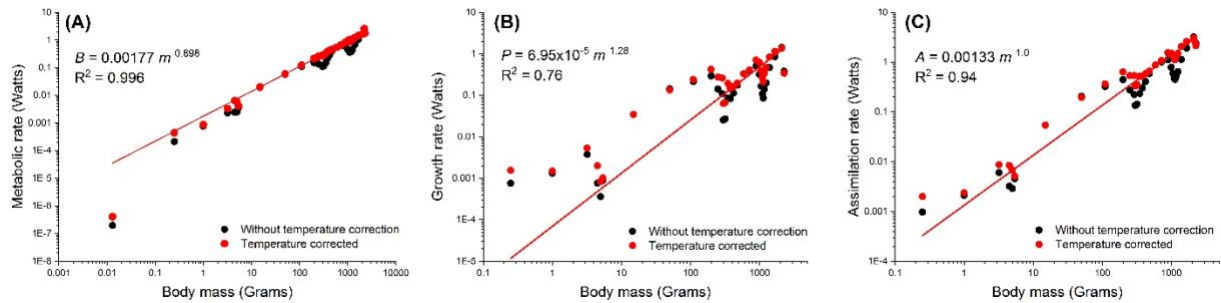

170

171 **Figure 3.** Plots on logarithmic axes and power-law scalings of rates of whole-organism

172 metabolism as functions of body mass before (black symbols) and after temperature (red

173 symbols and regression lines) correction). (A) Respiration rate (Brett’s “total metabolic rate”):

174  $B = 0.00177m^{0.898}$ ;  $R^2 = 0.996$ ; (B) Rate of biomass production (from Brett’s “growth rate” in

175 %/day  $P = 6.95 \times 10^{-5} m^{1.29}$ ;  $R^2 = 0.76$ ; (C) Assimilation rate (sum of the above two rates):  $A =$

176  $0.00133m^{1.0}$ ;  $R^2 = 0.94$ .

177

178 Brett’s data for sockeye salmon are qualitatively consistent with predictions from

179 metabolic scaling theory, but with quantitative caveats. Brett (1983, p. 33) determined that the

180 temperature dependence is “equivalent to a  $Q_{10}$  of about 2.3.” We used this value to

181 temperature-correct the rates of respiration, growth and assimilation, and determine their

182 scalings with body mass (Fig. 3). The scaling relationships are sublinear ( $\alpha < 1$ ) as has been

183 found almost universally, but the exponents (slopes) are consistently higher than  $\alpha \approx 0.75$

184 expected from standard metabolic theory (Brown et al. 2004) and data for most other animals

185 (e.g., “Kleiber’s rule”: Kleiber 1932; Peters 1983; Calder 1984; Schmidt-Nielsen 1984; Sibly et al.

186 2012). We are uncertain how to interpret these deviations. On the one hand, salmon have an  
187 unusual physiology and ecology as indicated above. On the other hand, the data might be  
188 inaccurate. Brett (1983, p. 32) cautions that “More often than not when compiling energy  
189 budgets growth is measured, metabolism estimated, assimilation efficiency assumed, and  
190 excretion deduced. ...The components of the balanced equation are sensitive to, and respond  
191 differently to, the chief variables of temperature, body size, and activity.” Since we have no  
192 objective basis to question or correct Brett’s values, we use them here with this caveat.  
193

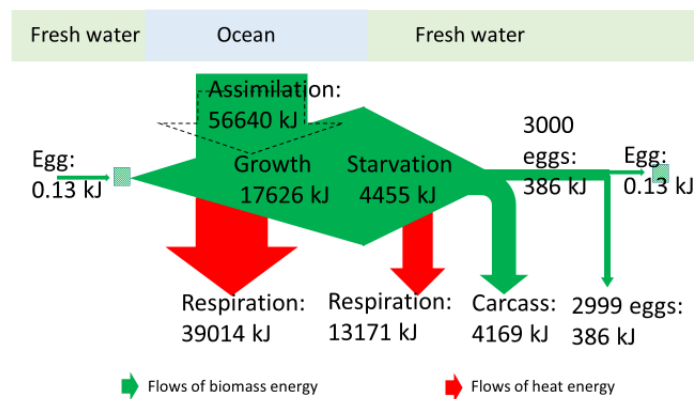

194  
195 **Figure 4.** Energy budget for an individual female sockeye salmon surviving-to-spawning in  
196 Babine Lake. Its life cycle starts with a single egg, which hatches, assimilates food energy,  
197 respire and grows, accumulating a store of body energy over most of its 4-year life. Then it  
198 stops feeding, migrates upstream and breeds, rapidly depleting its stored body energy for  
199 respiration to fuel migration and reproduction. It dies after spawning, leaving a depleted  
200 carcass and a clutch of 3,000 eggs. The budget for a male is similar but he allocates less energy  
201 to sperm and more to respiration for courtship and mating.

202

203 *Energy balance of an individual.*—An energy budget for the average individual that survives to  
204 breed accounts for stocks and flows of energy over one generation (Fig. 4):

205 1) egg: The energy budget starts with a single fertilized egg, weighing 0.013 g and containing  
206 0.13 kJ of energy. The egg lies inactive in the gravel, transforms from an embryo into a fry, and  
207 hatches after about nine months, having lost about one-third of its mass and energy due to  
208 respiration.

209 2) feeding, maintenance and growth: In the three plus years between hatching and breeding,  
210 the offspring assimilates 56,640 kJ of energy by feeding, expends 39,014 kJ (69%) on aerobic  
211 respiration, and produces 17,626 kJ (31%) in body energy reserves. More than 98% of the total  
212 lifetime assimilation and growth occurs in the ocean, where the juveniles swim and feed almost  
213 continuously.

214 3) migration and breeding: Once a mature salmon enters fresh water, it stops feeding and lives  
215 off its body reserves. In the last 45 days of life, an individual expends 13,071 kJ (75%) of its body  
216 energy on respiration for the energy-expensive activities of migration and spawning.

217 4) parental investment: A very small fraction of stored body energy is allocated to parental  
218 investment in gametes. The clutch of 3,000 eggs contains 390 kJ, only 5% of lifetime biomass  
219 production and an even smaller 0.8% of lifetime assimilation. The male invests even less energy  
220 in sperm.

221 5) carcass: When the spawned-out adult dies, its weight has decreased from 2,270 to 2,161 g.  
222 The carcass, depleted of nearly all fat and much of its protein, contains mostly water and only  
223 4,169 kJ of energy. Of the 17,626 kJ stored in the body at the start of migration, 13,457 kJ has

224 been expended, 13,071 kJ on respiration and 386 kJ on eggs. "The energy expended in  
225 migration and the release of 3,000 ova have finally reduced the female to ... not quite one-  
226 quarter of the maximum body energy achieved at the end of ocean growth" (Brett 1983, p. 50).

227 6) production efficiency: The efficiency of individual production,  $T_{ind}$ , is the ratio of output over  
228 input or production over assimilation:

$$229 \quad T_{ind} = P_{ind}/A_{ind} \quad (2)$$

230 It varies with water temperature and age (Table 1), decreasing from >60% for fry and  
231 smolts in warm water to <25% for the older stages in cold ocean water. By the time a single  
232 salmon stops feeding and enters fresh water for the return migration she has accumulated 37%  
233 of assimilated energy in her body as growth. When she dies three months later, after expending  
234 more than 75% of this store on respiration for migration and spawning, her clutch of eggs and  
235 depleted body contains just 17% of the energy she assimilated over her lifetime.

236 *Energy balance of a cohort.*—At least as relevant for life history and ecology is the energy  
237 budget for the population or a representative cohort. This accounting includes intake and  
238 expenditure of all offspring produced by a pair of breeders, including those that died before  
239 reproducing. Brett (1986) called these losses the "life-cycle deficit" when he estimated the  
240 "food conversion efficiency" of the Babine Lake population.

241 We obtained similar results using somewhat different methods. Since the population  
242 was approximately constant during Brett's study, we assumed steady state and used the MLT  
243 (Table 1) to compile a balanced energetic budget for a cohort (Fig. 5, Table 2):

244 1) juveniles in fresh water: The energy budget for the cohort starts with 3,000 fertilized eggs  
245 containing 386 kJ of energy. By the time the survivors have hatched, fed, grown, migrated

246 downstream, and transformed into smolts, most of the initial 3,000 offspring have died and  
247 returned 166,000 kJ of assimilated energy to the ecosystem: 2,916 carcasses containing 43,000  
248 kJ and 123,000 kJ of respired heat energy.

249 2) juveniles in the ocean: The 84 surviving smolts have assimilated 9,570 kJ of food, expended  
250 7,100 kJ on respiration, and amassed 2,470 kJ of body energy that they take with them to sea.  
251 There they feed and swim almost continuously, assimilating 68,000 kJ and expending 22,300 kJ  
252 on respiration. An additional 80 juveniles die in the ocean, leaving 267,700 kJ of assimilated  
253 energy in the ecosystem: 114,100 kJ of biomass in their carcasses and 153,600 kJ of respired  
254 heat energy.

255 3) migration and breeding: After two years at sea, the bodily energy of the four survivors has  
256 increased nearly 30 times, to 70,504 kJ of stored biomass that they take with them as they  
257 migrate upstream to breed. More than 99% of this energy is dissipated in fresh water: 52,600 kJ  
258 as respiration and 17,500 kJ in carcasses, leaving only 386 kJ in the new clutch of 3,000 eggs.

259 4) production efficiency: We estimate the efficiency of production for the cohort,  $T_{cohort}$ , of all  
260 offspring of an average female up until a given stage,  $S_{ref}$ :

$$261 \quad T_{cohort} = P_{cohort} / A_{cohort}$$

262 and

$$263 \quad P_{cohort} = \sum_{S=0}^{S=S_{ref}} N_d E_d$$

264 and

$$265 \quad A_{cohort} = \sum_{S=0}^{S=S_{ref}} N_d A_d \quad (3)$$

266 and where  $N_d$  is the number of offspring dying before stage,  $S$ , and  $E_d$  and  $N_d$  are respectively,  
267 total body energy content (production) and cumulative assimilation (production plus

268 respiration) of those offspring when they died. Production efficiencies of juveniles are high  
 269 (32% in fresh water and 40% in the ocean), but most of this production is transported back into  
 270 fresh water, where it is expended on respiration for migration and breeding. The overall  
 271 production efficiency of the cohort over one generation is only 12%.

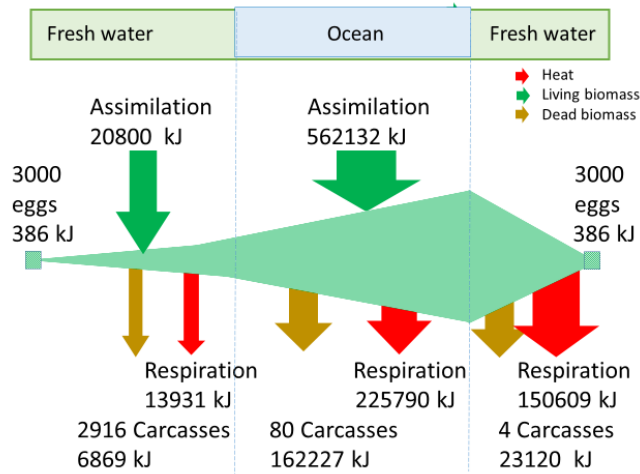

272  
 273 **Figure 5.** Balanced energy budget for a cohort of Babine Lake sockeye salmon. The accounting  
 274 starts in fresh water with a clutch of 3,000 eggs. After hatching, the fry and smolts feed, grow,  
 275 and suffer mortality before entering the ocean. After voracious feeding, rapid growth, and  
 276 additional mortality at sea, four survivors expend most of their stored body energy migrating  
 277 upstream to the breeding grounds. Two adults survive to spawn, leaving depleted carcasses and  
 278 another clutch of 3,000 eggs.

279  
 280 Table 2 uses the energy budget of the cohort (Fig. 5) and the MLT (Table 1) to quantify  
 281 the impact of salmon on freshwater and marine ecosystems. Of the food consumed and  
 282 biomass produced by juveniles in fresh water, 32% is left in fresh water as heat of respiration  
 283 and biomass of carcasses. Of the energy consumed and produced by juveniles in the ocean,

284 40% is left in the marine ecosystem due to respiration and mortality. More than half (60%) of  
285 the total energy produced by the cohort is transported from the ocean into streams and lakes  
286 in the bodies of the four adults returning to breed. The majority of this stored body energy  
287 (74%) is expended on respiration. The biomass in the carcasses consumed by scavengers and  
288 decomposers, and in eggs and sperm, is only 12% of the energy obtained in the ocean.

289 At steady state, the production efficiency of a cohort or species population is equivalent  
290 to the trophic transfer efficiency in ecosystem ecology

$$291 T_{cohort} = T_{eco} = A_2/A_1 \quad (4)$$

292 the ratio of assimilation rates:  $A_2$ , the rate of energy consumption by a higher trophic level  
293 (e.g., predator or decomposer), over  $A_1$ , the rate of uptake by the next lower trophic level (e.g.,  
294 prey). So  $T_{cohort}$  indexes the efficiency of converting salmon food into salmon biomass. For  
295 Babine Lake sockeye population this efficiency is ~12%, close to the 10% often taken as the  
296 rule-of-thumb average for diverse taxa and ecosystems (e.g., Lindeman 1942; Humphreys 1979;  
297 May 1979; Pauly and Christensen 1995; [https://en.wikipedia.org/wiki/Ecological\\_pyramid](https://en.wikipedia.org/wiki/Ecological_pyramid)).

### 298 ***Discussion: broader implications***

299 The metabolic life table of *Oncorhynchus nerka* highlights a fundamental duality of life.  
300 On the one hand, each species is unique: its specialized structure and function, behavior and  
301 ecology reflect the interacting effects of ontogeny and phylogeny, genotype and environment.  
302 On the other hand, all species share attributes inherited from the single origin of life and  
303 constrained by universal scientific laws.

304 *Comparison with dynamic energy budgets.*—MLTs are similar in some respects to dynamic  
305 energy budgets (DEBs: e.g. Kooijman and Kooijman 2010; Sousa et al. 2008, 2010). Both aim to

306 contribute to a general theory of biological metabolism. Both specify how data can be used to  
307 test theoretical predictions. Both have been applied to the empirical model of Pacific salmon  
308 (Pecquerie et al. 2011; Nisbet et al. 2012). The primary difference is that DEB focuses on how  
309 underlying processes at molecular and cellular levels contribute to metabolic homeostasis at  
310 the individual organism level, whereas MLT focuses on how metabolism at the whole-organism  
311 level affects demography of populations and energetics of ecosystems. Consequently, DEB  
312 models are usually more detailed, with more parameters to be measured or estimated,  
313 whereas MLTs incorporate just a few robust assumptions and parameters. The two frameworks  
314 offer alternative, but not mutually exclusive theories that apply biophysical laws to understand  
315 of both species-specific and universal characteristics of living things (see below).

316 *Physiology, ecology and evolution of salmon.*—*Oncorhynchus nerka* is a an exemplar of how  
317 natural selection has created a unique suite of physiological, behavioral and ecological traits  
318 (Quinn 2018). These special features beg for explanation in terms of phylogenetic history and  
319 natural selection playing out in temporally and spatially varying environments. The MLT  
320 provides such an explanation from the perspective of energetics. It combines the demography  
321 of a traditional life table with the physiological ecology of a balanced energy budget. By  
322 analyzing the wealth of data on this well-studied and economically valuable fish in the context  
323 of recent advances in metabolic theory, the MLT provides a formal structure that integrates and  
324 synthesizes many aspects of population biology, physiological ecology, and ecosystem  
325 energetics.

326 *Energetics of migration.*—Several features of the MLT reflect the central role of migration. Very  
327 little energy, 1,092 kJ, is produced by the fresh water stages, even though these account for



328 most of the individuals and about half of the four-year life cycle. Despite the large clutch of  
329 eggs spawned, the freshwater stages produce very little biomass because of small size and high  
330 mortality. Nearly all of the biomass energy produced over the life cycle (98% for a surviving  
331 breeder and 96% for an entire cohort) is acquired by the voracious feeding and rapid growth of  
332 the marine stages. The vast majority of this production, stored as body energy and transported  
333 into fresh water by returning adults, is expended on the respiration for migration and breeding.  
334 By the time they spawn, adults have expended 74% of their body energy, leaving only 24% in  
335 depleted carcasses and 2% in gametes.

336 *Sockeye and kokanee.*—Comparisons between closely related populations provide additional  
337 insights. As indicated by fossil history and shared traits associated with reproduction in fresh  
338 water, the ancestral salmonids lived in streams and lakes (Hoar 1976). Multiple lineages  
339 subsequently evolved independent life histories in which juveniles migrate to sea, grow to  
340 maturity, and migrate back to fresh water to breed (McCormick and Saunders 1987). A  
341 consequence is a diversity of salmonid lifestyles, with closely related migratory and sedentary,  
342 anadromous and “land-locked” populations.

343 *Oncorhynchus nerka* is a good example. Sea run sockeye are widely distributed, with  
344 marine stages in the North Pacific and freshwater stages in coastal drainages. Another morpho-  
345 ecotype, known as kokanee, spends its entire life cycle in fresh water, with native populations  
346 in lakes scattered throughout the range and introduced populations more broadly distributed  
347 (Quinn 2018). Kokanee and sockeye represent alternative yet evolutionary stable strategies:  
348 different combinations of traits that confer equal fitness. Landlocked kokanee of the same age  
349 are smaller and less fecund (~700 g and ~800 eggs) than sea-run sockeye (~2,700 g and ~3,000

350 eggs; USDA Forest Service 2015). These and many other differences originated when  
351 populations diverged from freshwater ancestors and evolved an anadromous lifestyle: by  
352 migrating to sea and feeding on the abundant plankton, ocean-run salmon were able to grow  
353 larger, produce more offspring, and occupy a distinctively different ecological niche. Despite  
354 the initial advantages that selected for the derived ocean-run ecomorphotype, however,  
355 kokanee and sockeye are now equally fit (Brown et al. 2018), as evidenced by the fact that in  
356 some locations the two populations coexist in alternative stable states and breed together but  
357 rarely hybridize. Compilation of a MLT for a population of kokanee would show quantitatively  
358 how the life history and energetics evolved in successful adaptation to its landlocked existence  
359 and reveal the tradeoffs that result in equal fitness between kokanee and anadromous salmon.  
360 *Ecosystem energetics.*—Another consequence of the anadromous lifestyle is that the enormous  
361 numbers of migrating salmon transport large quantities of energy and materials from marine to  
362 freshwater and surrounding terrestrial ecosystems (Juday et al. 1932) originally suggested, also  
363 Krokhin 1967, Donaldson 1967; long ago Cederholm et al. 1999; Gende 2002; Naiman 2002;  
364 Schindler et al. 2003, 2005; Quinn et al. 2018). Inorganic compounds in the bodies of salmon  
365 are major sources of nutrients for freshwater algae and land plants. Large quantities of the  
366 biomass energy are also transported into fresh water. Most of the lipids and proteins and some  
367 of the carbohydrates are catabolized in aerobic respiration, generating ATP and releasing  
368 carbon dioxide, water and heat into the environment. A smaller but substantial quantity of  
369 salmon biomass is consumed by predators, scavengers and decomposers in freshwater and  
370 surrounding terrestrial ecosystems.

371           The ecological impact of this input is substantial because of the large body size and  
372 sheer numbers of migrants. When Brett did his studies in the late 1970s and early 1980s, the  
373 Skeena River sockeye was in approximate steady state and the annual runs of returning adults  
374 averaged about 3 million (Larkin and McDonald 1968; [http://waves-vagues.dfo-](http://waves-vagues.dfo-mpo.gc.ca/Library/342179.pdf)  
375 [mpo.gc.ca/Library/342179.pdf](http://waves-vagues.dfo-mpo.gc.ca/Library/342179.pdf)). Multiplying this by the 17,626 kJ of body energy per individual  
376 leaving the ocean gives about 53,000 megajoules of ocean production (or 1,500 tonnes of  
377 organic carbon) transported to freshwater and terrestrial ecosystems of the Skeena River basin.  
378 For reference, this annual energy subsidy is equal to the annual net primary production of  
379 approximately 6,000 ha of taiga forest:  $\sim 25 \text{ gC/m}^2$   
380 ([https://daac.ornl.gov/NPP/guides/NPP\\_BOREAL.html](https://daac.ornl.gov/NPP/guides/NPP_BOREAL.html)). See Burger et al. (2012) for similar  
381 energetic analysis for sockeye and sustainability of the Bristol Bay fishery in Alaska. As the  
382 number of returning salmon have decreased due to human activities (see below), the reduced  
383 marine subsidies of energy and nutrients have caused substantial changes in freshwater,  
384 marine and terrestrial ecosystems (Cederholm et al. 1999; Gende 2002; Naiman 2002; Schindler  
385 et al. 2003, 2005; Burger et al. 2012; Quinn et al. 2018).

386 *Use of wild salmon by humans.*—Few wild animals have been as important to humans as  
387 salmon. For thousands of years native fishers captured returning breeders in nets and traps at  
388 the mouths of rivers, preserved their flesh by drying and smoking, and budgeted the stored  
389 food to last through the lean months and years between good runs. Since the arrival of  
390 Europeans, populations have declined precipitously due to overfishing of juveniles at sea,  
391 overharvesting of migrating adults as they come inshore, damming and pollution of rivers, and  
392 changes in ocean temperature and productivity. Ironically, one of the seriously depleted stocks

393 is the Skeena River population that Brett studied. Annual returns fluctuated around 3 million  
394 until the late 1990s, then dipped to all-time lows. Harvests by commercial, recreational and  
395 Native American fishers are now severely restricted ([https://waves-vagues.dfo-](https://waves-vagues.dfo-mpo.gc.ca/Library/342179.pdf)  
396 [mpo.gc.ca/Library/342179.pdf](http://vancouver.sun.com/business/local-business/skeena-river-sockeye-returns-forecast-at-all-time-low-sports-fishing-closed); [http://vancouver.sun.com/business/local-business/skeena-river-](http://vancouver.sun.com/business/local-business/skeena-river-sockeye-returns-forecast-at-all-time-low-sports-fishing-closed)  
397 [sockeye-returns-forecast-at-all-time-low-sports-fishing-closed](http://vancouver.sun.com/business/local-business/skeena-river-sockeye-returns-forecast-at-all-time-low-sports-fishing-closed)).

398 *Aquaculture and artificial selection.*—Over the last 50 years as harvests of wild stocks have  
399 decreased, production of farmed Pacific salmon has increased rapidly  
400 ([https://en.wikipedia.org/wiki/Aquaculture\\_of\\_salmonids](https://en.wikipedia.org/wiki/Aquaculture_of_salmonids)). The semelparous life history,  
401 efficient biomass production, flesh rich in lipids and proteins, and other traits make salmon  
402 especially well-suited for aquaculture. Artificial selection, technological applications to  
403 husbandry, and massive inputs of fossil fuel energy have increased production with consequent  
404 reduction in swimming speed and endurance, and territorial, reproductive, and antipredator  
405 behaviors that were adaptive in the wild. Results have been spectacular, achieving production  
406 efficiencies (P/A: flesh output over food input) of 25-50% for factory-farmed fish  
407 ([https://en.wikipedia.org/wiki/Aquaculture\\_of\\_salmonids](https://en.wikipedia.org/wiki/Aquaculture_of_salmonids)). Comparison with wild stocks is  
408 complicated, however, by withholding of proprietary information and difficulties in compiling  
409 complete energy budgets that account for the large subsidies of additional energy, mostly from  
410 fossil fuels, to create specially formulated diets enriched in digestible carbohydrates, fish oils,  
411 and carotenoids, minimize losses due to predators and pathogens, and artificially breed, house,  
412 and move fish between freshwater and marine environments (Naylor et al. 1998;  
413 [https://en.wikipedia.org/wiki/Aquaculture\\_of\\_salmonids](https://en.wikipedia.org/wiki/Aquaculture_of_salmonids)).

414 *Impacts of climate change.*—Recently Huey and Kingsolver (2019) used Brett’s (1970, 1971;  
415 Brett et al. 1969) early studies on “fingerling” sockeye (smolts: < 5 g body weight, <20 months  
416 old, in fresh water) to “develop a basic bioenergetic model that examines how the combined  
417 effects of climate warming,  $T_b$  (body temperature), and food intake alter the energetics and  
418 thermoregulatory strategies of ectotherms.” The model predicts that “warming plus the  
419 associated food restriction could potentially amplify negative effects of climate warming,  
420 effectively lead to a “metabolic meltdown,” and thereby accentuate any negative energetic  
421 consequences of warming” (see also Thomas et al. 2017). Important for such prediction,  
422 however, is the effect of climate change not only on intrinsic metabolic physiology (i.e., rates of  
423 assimilation, respiration and growth: Figs. 2-3), but also on extrinsic environmental conditions,  
424 especially food supply. Capture and assimilation of food depends largely on encounter rate,  
425 which in turn depends on density of the prey and swimming speed of the predator, any or all of  
426 which may be altered by climate change (e.g., Grady et al. 2019). To the extent that these  
427 extrinsic environmental factors can be predicted, the MLT provides a basis for incorporating the  
428 marine and returning adult stages to model the effects of climate change on the entire life cycle  
429 of sockeye.

430 *Universal laws of life.*—The MLT constructed and analyzed here from Brett’s detailed data not  
431 only provides an empirical “life table of energetics” for a single model species, it also offers  
432 quantitative examples of universal characteristics of living things. These include the exponential  
433 decrease in survival with age and the scalings of the metabolic rates of assimilation, respiration  
434 and production with body size and temperature. More generally, the MLT indicates how

435 variation in physiological, life history and ecological traits is constrained by two biophysical laws  
436 that apply to all organisms at steady state (Brown et al. 2018; Burger et al. 2019):

437 1) *a demographic constraint* dictates that in all sexually reproducing organisms, regardless of  
438 the number and size of offspring hatched or born, only two survive on average to maturity and  
439 reproduce to replace their parents; and

440 2) *an energy balance constraint* dictates the relationships between uptake and expenditure, the  
441 tradeoff between offspring growth and parental investment, and the scalings of production and  
442 generation time with body size and temperature.

443 Together, these laws dictate the relationship between the life history – the schedule of  
444 survival and reproduction – and the energy budget – the balance of energy uptake from the  
445 environment and allocation to metabolism. These constraints are absolute; there can be no  
446 exceptions. At steady state a population of sockeye salmon – and any other species – must  
447 conform to demographic equilibrium and energy balance. It is far from trivial, however, to  
448 predict the particular combinations of life history and metabolic traits that allow a species to  
449 persist. It is even more difficult to predict how these traits will be affected by departures from  
450 steady state, such as when a population grows or declines, or is subject to natural or artificial  
451 selection or human harvest. Two such applied questions are:

452 1) How much “take” for human consumption or increase in mortality due to dams, pollution,  
453 climate change and other human impacts can a wild salmon population sustain without  
454 collapsing? Many sockeye stocks have declined precipitously to some small fraction of their  
455 historic value, but in 2018 humans still harvested an estimated 79% (49.8 million of the 63.0

456 million mature sockeye returning to Bristol Bay, Alaska

457 <https://www.adfg.alaska.gov/FedAidPDFs/FMR19-12.pdf>)

458 2) How do life history and energetic traits affect biomass production efficiency and economic  
459 profitability of sockeye in aquaculture? The MLT for the wild Babine Lake population highlights  
460 likely targets for husbandry and selection. These include: i) changing rearing conditions to  
461 reduce mortality of immature stages due to starvation, competition, predation and disease; ii)  
462 feeding diets that enhance growth rates; iii) genetic modification and artificial selection so that  
463 less assimilated energy is expended on respiration and more on growth; and iv) implementation  
464 of technologies that use exogenous energy from fossil fuels to substitute for biological energy  
465 sources (i.e., moving stocks to substitute for natural migration and feeding diets that do not  
466 require continuous swimming to forage). These technologies are currently being applied, but  
467 they are regarded as trade secrets in competition for markets, so there is limited information  
468 on their effects on metabolic and economic efficiency of salmon aquaculture.

469 In conclusion, the MLT framework that Brett pioneered decades ago to synthesize  
470 information on life history, demography, energetics and physiology of sockeye salmon is widely  
471 applicable to contemporary metabolic ecology. We encourage data compilation in an MLT  
472 framework for additional species to evaluate universalities from emerging metabolic life history  
473 theories (e.g., Brown et al. 2018; Burger et al. 2019). Doing so will have additional practical  
474 applications for sustainable resource management, biodiversity conservation and predicting  
475 global change impacts on demography and populations of species.

476

477 **References:**

478 Brett, J.R., J.E. Shelbourn, and C.T. Shoop. 1969. Growth rate and body composition of fingerling  
479 sockeye salmon, *Oncorhynchus nerka*, in relation to temperature and ration size. J. Fish. Board  
480 of Can. 26, 9: 2363-2394.

481

482 Brett, J.R. 1970. Temperature, fishes. Pages 515–560 in O. Kinne, ed. Marine ecology. Vol. 1.  
483 Wiley, New York.

484

485 Brett, J.R. 1971. Energetic responses of salmon to temperature. A study of some thermal  
486 relations in the physiology and freshwater ecology of sockeye salmon (*Oncorhynchus nerka*).  
487 Am. Zool. 11, 1: 99-113.

488

489 Brett, J.R. 1972. The metabolic demand for oxygen in fish, particularly salmonids, and a  
490 comparison with other vertebrates. Respir. Physiol., 14, 1-2: 151-170.

491

492 Brett, J.R. and Glass, N.R., 1973. Metabolic rates and critical swimming speeds of sockeye  
493 salmon (*Oncorhynchus nerka*) in relation to size and temperature. J. Fish. Board of Can, 30,  
494 3:379-387.

495

496 Brett, J.R. 1983. Life energetics of sockeye salmon, *Oncorhynchus nerka*. In Behavioral  
497 energetics: the cost of survival in vertebrates (eds W. P. Aspey W.P., and Lustick, S.I.) 2, 29-63  
498 (Ohio State University Press).



499

500 Brett, J.R., 1986. Production energetics of a population of sockeye salmon, *Oncorhynchus nerka*.

501 Can. J. Zool., 64, 3: 555-564.

502

503 Brown, J.H., Gillooly, J.F., Allen, A.P., Savage, V.M. & West, G.B. 2004. Toward a metabolic

504 theory of ecology. Ecology. 85: 1771-1789.

505

506 Brown JH, Hall CA, Sibly RM. 2018. Equal fitness paradigm explained by a trade-off between

507 generation time and energy production rate. Nat. Ecol. Evol. 2, 2:262.

508

509 Burger, J.R., Allen, C.D., Brown, J.H., Burnside, W.R., Davidson, A.D., Fristoe, T.S., Hamilton, M.J.,

510 Mercado-Silva, N., Nekola, J.C., Okie, J.G. and Zuo, W., 2012. The macroecology of

511 sustainability. PLoS Biol., 10, 6: p.e1001345.

512

513 Burger, J.R., C. Hou, J.H. Brown. 2019. Toward a metabolic theory of life history. Proceedings of

514 the National Academy of Sciences. 26653–26661, 116: 52. doi:10.1073/pnas.1907702116

515

516 Calder, W.A. 1984. Size, function, and life history. (Harvard Univ. Press).

517

518 Cederholm C.J., Kunze M.D., Murota T., Sibatani A. (1999). Pacific salmon carcasses: essential

519 contributions of nutrients and energy for aquatic and terrestrial ecosystems. Fisheries 24: 6–15.

520

521 Donaldson, J.R. 1967. Phosphorus budget of Iliamna Lake, Alaska, as related to the cyclic  
522 abundance of sockeye salmon. Ph.D. Thesis. Univ. Washington, Seattle.  
523  
524 Furnell, D.J. and Brett, J.R., 1986. Model of monthly marine growth and natural mortality for  
525 Babine Lake sockeye salmon (*Oncorhynchus nerka*). Can. J. Fish. Aquat. Sci., 43, 5: 999-1004.  
526  
527 Gende S.M., Edwards R.T., Willson M.F., Wipfli M.S. 2002. Pacific salmon in aquatic and  
528 terrestrial ecosystems. BioScience 52: 917–928.  
529  
530 Gillooly, J.F., Brown, J.H., West, G.B., Savage, V.M. and Charnov, E.L., 2001. Effects of size and  
531 temperature on metabolic rate. Science, 293, 5538: 2248-2251.  
532  
533 Hall, C.A.S. 1972. Migration and metabolism in a temperate stream ecosystem. Ecology 53, 4:  
534 585-604.  
535  
536 Hall, C.A.S. 1995. Maximum power: the ideas and applications of H.T. Odum. (University of  
537 Colorado Press, Boulder).  
538  
539 Hoar, W.S. 1976. Smolt transformation: evolution, behavior and physiology. Journal of the  
540 Fisheries Research Board of Canada. 33: 1233-1252.  
541

542 Humphreys, W.F. 1979. Production and respiration in animal populations. *J. Animal Ecol.* 48,  
543 427-453.

544

545 Huey, R.B. and Kingsolver, J.G., 2019. Climate warming, resource availability, and the metabolic  
546 meltdown of ectotherms. *The American Naturalist*, 194, 6: E140-E150.

547

548 Juday, C., W. H. Rich, G. I. Kemmerer, and A. Mann. 1932. Limnological studies of Karluk Lake,  
549 Alaska, 1926-1930. *U.S. Bur. Fish. Bull.* 57:407-436

550

551 Kleiber, M. 1932. Body size and metabolism. *Hilgardia* 6: 315-353.

552

553 Kooijman, B. and Kooijman, S.A.L.M., 2010. Dynamic energy budget theory for metabolic  
554 organisation. Cambridge University Press.

555

556 Krokhin, E.M. 1967. (Effect of size of escapement of sockeye salmon spawners on the  
557 phosphate content of a nursery lake.) *Izvestiya Tikhookeanskogo Nauchno- Issledovatel'skogo.*

558 *Instituta Rybnogo Khozyaistva i Okeanografii.* 57. *Fish. Res. Bd. Canada. Translation Series No.*

559 1186:31-54.

560

561 Larkin, P.A. and McDonald, J.G., 1968. Factors in the population biology of the sockeye salmon  
562 of the Skeena River. *J. Anim. Ecol.*, pp.229-258.

563

- 564 Lindeman R.L. 1942. The trophic-dynamic aspect of ecology. *Ecology* 23, 4:399–417.
- 565
- 566 Lotka, A.J. 1922. Contribution to the energetics of evolution. *Proc. Natl Acad. Sci. USA* 8: 147-
- 567 151.
- 568
- 569 Lotka, A.J., 1925. *Elements of Physical Biology*. Williams and Wilkins, Baltimore.
- 570
- 571 May, R.M., Beddington, J.R., Clark, C.W., Holt, S.J. & Laws, R.M. 1979. *Science*. 203, 267- 277.
- 572
- 573 McCormick SD and Saunders RL. 1987. Preparatory physiological adaptations for marine life in
- 574 salmonids: osmoregulation, growth and metabolism. *Am Fish Soc Symp.* 1: 211–229.
- 575
- 576 Naiman R.J., Bilby R.E., Schindler D.E., Helfield J.M. 2002. Pacific salmon, nutrients, and the
- 577 dynamics of freshwater and riparian ecosystems. *Ecosystems* 5: 399–417.
- 578
- 579 Naylor, R.L., Goldburg, R.J., Mooney, H., Beveridge, M., Clay, J., Folke, C., Kautsky, N.,
- 580 Lubchenco, J., Primavera, J. and Williams, M., 1998. Nature's subsidies to shrimp and salmon
- 581 farming. *Science*, 282, 5390, 883-884.
- 582
- 583 Nisbet, R.M., Jusup, M., Klanjscek, T. and Pecquerie, L. 2012. Integrating dynamic energy budget
- 584 (DEB) theory with traditional bioenergetic models. *J. Exp. Biol.*, 215, 6: 892-902.
- 585

586 Odum, H.T. & Pinkerton, R.C. 1955. Time's speed regulator: the optimum efficiency for  
587 maximum power output in physical and biological systems. *Amer. Sci.* 43, 331-343.  
588

589 Pauly, D. & Christensen, V. 1995. Primary production required to sustain global fisheries. *Nature*  
590 374, 255–257.  
591

592 Pecquerie, Laure, Leah R. Johnson, Sebastiaan ALM Kooijman, and Roger M. Nisbet. 2011.  
593 Analyzing variations in life-history traits of Pacific salmon in the context of Dynamic Energy  
594 Budget (DEB) theory. *J. Sea Res.* 66, 4: 424-433.  
595

596 Peters, R.H. 1983. *The ecological implications of body size* (Cambridge Univ. Press).  
597

598 Quinn, T.P., 2018. *The behavior and ecology of Pacific salmon and trout*. University of  
599 Washington Press.  
600

601 Quinn, TP, Helfield, JM, Austin, CS, Hovel, RA, Bunn, AG. 2018. A multidecade experiment shows  
602 that fertilization by salmon carcasses enhanced tree growth in the riparian zone. *Ecology*, 99,  
603 11: 2433-2441.  
604

605 Schindler DE, Scheuerell MD, Moore JW, Gende SM, Francis TB, et al. 2003. Pacific salmon and  
606 the ecology of coastal ecosystems. *Front Ecol Environ* 1: 31–37.  
607

608 Schindler D.E., Leavitt P.R., Brock C.S., Johnson S.P., Quay P.D. 2005. Marine-derived nutrients,  
609 commercial fisheries, and production of salmon and lake algae in Alaska. *Ecology* 86: 3225–  
610 3231.

611  
612 Schmidt-Nielsen, K. 1984. *Scaling: why is animal size so important?* (Cambridge Univ. Press).

613  
614 Sibly, R.M., Brown, J.H. & Kodric-Brown. 2012. A. eds. *Metabolic ecology: a scaling approach*  
615 (John Wiley-Blackwell).

616  
617 Sousa, T., Tiago D., and Kooijman, S.A.L.M. 2008. From empirical patterns to theory: a formal  
618 metabolic theory of life." *Philos. T. R. Soc. B: Biol. Sci.* 363, no. 1502: 2453-2464.

619  
620 Sousa, T., Domingos, T., Poggiale, J.C. and Kooijman, S.A.L.M., 2010. Dynamic energy budget  
621 theory restores coherence in biology. *Philos. T. R. Soc. B: Biol. Sci.* 365, 1557: 3413-3428.

622  
623 Thomas, M.K., Aranguren-Gassis, M., Kremer, C.T., Gould, M.R., Anderson, K., Klausmeier, C.A.  
624 and Litchman, E., 2017. Temperature–nutrient interactions exacerbate sensitivity to warming in  
625 phytoplankton. *Global Change Biology.* 23, 8: 3269-3280.

626  
627 USDA Forest Service 2015. Kokanee Salmon Conservation Education Program. Lake Tahoe Basin  
628 Management Unit, Tahoe Heritage Foundation.

629 [https://www.fs.usda.gov/Internet/FSE\\_DOCUMENTS/stelprdb5391112.pdf](https://www.fs.usda.gov/Internet/FSE_DOCUMENTS/stelprdb5391112.pdf) (accessed Mar 12,  
630 2019).

631

632 Van Valen, L. 1973. A new evolutionary law. *Evolutionary Theory* 1, 1-30.

633

634 West, G.B., Brown, J.H. and Enquist, B.J., 1997. A general model for the origin of allometric  
635 scaling laws in biology. *Science*, 276, 5309: 122-126.

636

637 <https://www.adfg.alaska.gov/FedAidPDFs/FMR19-12.pdf>. (accessed Mar 12, 2019).

638 <http://waves-vagues.dfo-mpo.gc.ca/Library/342179.pdf> (accessed Mar 12, 2019).

639 [http://vancouver.sun.com/business/local-business/skeena-river-sockeye-returns-forecast-at-all-](http://vancouver.sun.com/business/local-business/skeena-river-sockeye-returns-forecast-at-all-time-low-sports-fishing-closed)  
640 [time-low-sports-fishing-closed](http://vancouver.sun.com/business/local-business/skeena-river-sockeye-returns-forecast-at-all-time-low-sports-fishing-closed) (accessed Mar 12, 2019).

641 [https://daac.ornl.gov/NPP/guides/NPP\\_BOREAL.html](https://daac.ornl.gov/NPP/guides/NPP_BOREAL.html) (accessed Mar 12, 2019).

642 [https://www.google.com/search?q=salmon+life+cycle&rlz=1C1CHFX\\_enUS555US555&source=lms&tbm=isch&sa=X&ved=0ahUKEwj7rZiC3PXWAhWBLmMKHRIiAM8Q\\_AUICigB&biw=1067&bih=423#imgsrc=WiztTrFdqAKvPM](https://www.google.com/search?q=salmon+life+cycle&rlz=1C1CHFX_enUS555US555&source=lms&tbm=isch&sa=X&ved=0ahUKEwj7rZiC3PXWAhWBLmMKHRIiAM8Q_AUICigB&biw=1067&bih=423#imgsrc=WiztTrFdqAKvPM): (accessed Mar 12, 2019).

643

644 [https://en.wikipedia.org/wiki/Aquaculture\\_of\\_salmonids](https://en.wikipedia.org/wiki/Aquaculture_of_salmonids) (accessed Mar 12, 2019).

645 [https://en.wikipedia.org/wiki/Ecological\\_pyramid](https://en.wikipedia.org/wiki/Ecological_pyramid) (accessed Mar 12, 2019).

646

647 [https://iseralaska.org/static/legacy\\_publication\\_links/2013\\_04-](https://iseralaska.org/static/legacy_publication_links/2013_04-TheEconomicImportanceOfTheBristolBaySalmonIndustry.pdf)  
648 [TheEconomicImportanceOfTheBristolBaySalmonIndustry.pdf](https://iseralaska.org/static/legacy_publication_links/2013_04-TheEconomicImportanceOfTheBristolBaySalmonIndustry.pdf) (accessed Mar 12, 2019).

649

650 **Table 1. Metabolic life table (MLT) for sockeye salmon in Babine Lake, based on data in Brett (1983, 1986). The definitions of**  
 651 **stages and traits follow Brett, although we have transformed his data into modern units and calculated additional parameters.**  
 652 **Green rows represent stages in freshwater and blue rows marine.**

653  
 654  
 655 **Individual values**

| Date<br>(mo/day) | Temp.<br>(oC) | Stage          | Age<br>(months) | Wet<br>weight<br>(g) | Number<br>alive<br>number | (dry/wet)<br>decimal | Energy<br>density<br>(kJ/g) | Body<br>energy<br>content<br>(kJ) | Production<br>rate<br>(watts) | Whole-organism<br>respiration rate<br>(watts) | Assimilation<br>rate<br>(watts) | Energy†<br>expended<br>(kJ) | Productio<br>n<br>efficiency<br>decimal | Cumulative<br>energy<br>expended<br>(kJ) |
|------------------|---------------|----------------|-----------------|----------------------|---------------------------|----------------------|-----------------------------|-----------------------------------|-------------------------------|-----------------------------------------------|---------------------------------|-----------------------------|-----------------------------------------|------------------------------------------|
| 15-Sep           | 6             | Egg            | 0               | 0.013                | 3000                      | 0.41                 | 9.90                        | 0.13                              | 0.0000                        | 0.0000002                                     | 0.0000000                       | 0.00                        | 0.00                                    | 0.00                                     |
| 15-Jun           | 6.0           | Fry (spring)   | 9.0             | 0.25                 | 600                       | 0.20                 | 4.60                        | 1.15                              | 0.00                          | 0.0002144                                     | 0.0009733                       | 0.08                        | 0.78                                    | 2.09                                     |
| 15-Aug           | 11.0          | Fry (summer)   | 11.0            | 1.00                 | 367                       | 0.22                 | 4.97                        | 4.97                              | 0.00                          | 0.00078                                       | 0.0021052                       | 2.09                        | 0.63                                    | 9.21                                     |
| 15-Oct           | 9.0           | Fry (fall)     | 13.0            | 3.20                 | 224                       | 0.23                 | 5.23                        | 16.73                             | 0.00                          | 0.00233                                       | 0.0060826                       | 7.12                        | 0.62                                    | 34.74                                    |
| 15-Feb           | 4.0           | Fry (winter)   | 17.0            | 4.50                 | 137                       | 0.23                 | 5.22                        | 23.51                             | 0.00                          | 0.00246                                       | 0.0032261                       | 25.53                       | 0.24                                    | 54.00                                    |
| 15-May           | 5.0           | Smolt yearling | 20.0            | 5.00                 | 84                        | 0.23                 | 5.20                        | 26.00                             | 0.00                          | 0.00254                                       | 0.0029052                       | 19.26                       | 0.12                                    | 62.37                                    |
| 15-Jun           | 11.0          | Smolt yearling | 21.0            | 5.40                 | 75                        | 0.24                 | 5.44                        | 29.39                             | 0.00                          | 0.00366                                       | 0.0045643                       | 8.37                        | 0.20                                    | 84.56                                    |
| 15-Jul           | 12.0          | Smolt yearling | 22.0            | 15.00                | 66                        | 0.25                 | 5.76                        | 86.34                             | 0.03                          | 0.02006                                       | 0.0547624                       | 22.19                       | 0.63                                    | 179.16                                   |
| 15-Aug           | 12.5          | Smolt yearling | 23.0            | 50.00                | 59                        | 0.26                 | 6.09                        | 304.74                            | 0.14                          | 0.06203                                       | 0.2060148                       | 94.60                       | 0.70                                    | 400.60                                   |
| 15-Sep           | 11.0          | Smolt yearling | 24.0            | 110.00               | 53                        | 0.27                 | 6.44                        | 708.65                            | 0.22                          | 0.10927                                       | 0.3250237                       | 221.44                      | 0.66                                    | 733.39                                   |
| 15-Oct           | 9.0           | Smolt yearling | 25.0            | 200.00               | 47                        | 0.27                 | 6.44                        | 1288.45                           | 0.30                          | 0.15216                                       | 0.4489740                       | 332.79                      | 0.66                                    | 1117.24                                  |
| 15-Nov           | 6.5           | Smolt yearling | 26.0            | 250.00               | 42                        | 0.28                 | 6.68                        | 1670.21                           | 0.14                          | 0.13447                                       | 0.2775480                       | 383.86                      | 0.52                                    | 1438.31                                  |
| 15-Dec           | 4.8           | Smolt yearling | 27.0            | 290.00               | 37                        | 0.28                 | 6.68                        | 1937.45                           | 0.11                          | 0.11523                                       | 0.2251318                       | 321.07                      | 0.49                                    | 1740.54                                  |
| 15-Jan           | 4.5           | Smolt yearling | 28.0            | 300.00               | 33                        | 0.28                 | 6.68                        | 2004.26                           | 0.03                          | 0.10903                                       | 0.1345524                       | 302.23                      | 0.19                                    | 2037.33                                  |
| 15-Feb           | 4.5           | Smolt yearling | 29.0            | 310.00               | 29                        | 0.28                 | 6.68                        | 2071.07                           | 0.03                          | 0.11266                                       | 0.1390374                       | 296.79                      | 0.19                                    | 2314.44                                  |
| 15-Mar           | 4.5           | Smolt yearling | 30.0            | 320.00               | 26                        | 0.28                 | 6.68                        | 2137.87                           | 0.03                          | 0.11630                                       | 0.1435225                       | 277.11                      | 0.19                                    | 2666.48                                  |
| 15-Apr           | 5.3           | Smolt yearling | 31.0            | 350.00               | 23                        | 0.29                 | 6.95                        | 2433.74                           | 0.09                          | 0.14925                                       | 0.2352539                       | 352.04                      | 0.37                                    | 3134.06                                  |
| 15-May           | 7.3           | Smolt yearling | 32.0            | 380.00               | 21                        | 0.29                 | 7.03                        | 2670.67                           | 0.08                          | 0.21913                                       | 0.3026008                       | 467.58                      | 0.28                                    | 3813.86                                  |
| 15-Jun           | 9.0           | 2 yr immature  | 33.0            | 420.00               | 18                        | 0.29                 | 7.05                        | 2962.01                           | 0.11                          | 0.29511                                       | 0.4082625                       | 679.81                      | 0.28                                    | 4715.95                                  |
| 15-Jul           | 11.0          | 2 yr immature  | 34.0            | 480.00               | 16                        | 0.29                 | 7.03                        | 3374.75                           | 0.18                          | 0.41170                                       | 0.5874999                       | 902.08                      | 0.30                                    | 5986.40                                  |



|        |      |               |      |         |    |      |      |         |      |         |           |         |      |          |
|--------|------|---------------|------|---------|----|------|------|---------|------|---------|-----------|---------|------|----------|
| 15-Aug | 12.0 | 2 yr immature | 35.0 | 590.00  | 15 | 0.29 | 7.04 | 4151.67 | 0.33 | 0.54893 | 0.8805507 | 1270.45 | 0.38 | 6142.54  |
| 15-Sep | 11.5 | 2 yr immature | 36.0 | 720.00  | 13 | 0.29 | 7.05 | 5074.27 | 0.39 | 0.62453 | 1.0122159 | 1562.63 | 0.38 | 7731.96  |
| 15-Oct | 9.3  | 2 yr immature | 37.0 | 890.00  | 11 | 0.29 | 7.04 | 6263.93 | 0.51 | 0.60379 | 1.1186258 | 1589.42 | 0.46 | 9151.43  |
| 15-Nov | 6.5  | 2 yr immature | 38.0 | 1000.00 | 10 | 0.30 | 7.28 | 7283.64 | 0.32 | 0.46520 | 0.7883632 | 1419.47 | 0.41 | 10315.56 |
| 15-Dec | 5.0  | 2 yr immature | 39.0 | 1060.00 | 9  | 0.30 | 7.16 | 7587.54 | 0.17 | 0.43147 | 0.5983565 | 1164.13 | 0.28 | 11380.48 |
| 15-Jan | 4.5  | 2 yr immature | 40.0 | 1100.00 | 8  | 0.30 | 7.16 | 7873.87 | 0.11 | 0.36247 | 0.4718452 | 1064.92 | 0.23 | 12349.96 |
| 15-Feb | 4.5  | 2 yr immature | 41.0 | 1130.00 | 7  | 0.30 | 7.16 | 8088.61 | 0.09 | 0.36688 | 0.4526258 | 969.48  | 0.19 | 13257.06 |
| 15-Mar | 4.5  | 2 yr immature | 42.0 | 1180.00 | 6  | 0.30 | 7.28 | 8594.70 | 0.14 | 0.38311 | 0.5224005 | 907.11  | 0.27 | 14376.40 |
| 15-Apr | 5.0  | 2 yr immature | 43.0 | 1250.00 | 6  | 0.30 | 7.28 | 9104.55 | 0.20 | 0.44824 | 0.6484892 | 1119.34 | 0.31 | 15805.08 |
| 15-May | 7.0  | 3 yr maturing | 44.0 | 1400.00 | 5  | 0.31 | 7.53 | 10537.0 | 0.46 | 0.67841 | 1.1419302 | 1428.68 | 0.41 | 18086.03 |
| 15-Jun | 9.5  | 4 yr maturing | 45.0 | 1670.00 | 4  | 0.31 | 7.53 | 12576.4 | 0.86 | 1.07630 | 1.9352652 | 2281.79 | 0.44 | 21685.61 |
| 15-Jul | 12.5 | Adult-mature  | 46.0 | 2100.00 | 4  | 0.32 | 7.77 | 16315.3 | 1.44 | 1.80118 | 3.2365951 | 3598.70 | 0.44 | 26813.00 |
|        |      |               |      |         |    |      |      | 17626.4 |      |         |           |         |      |          |
| 1-Aug  | 13.0 | Adult-mature  | 46.5 | 2270.00 | 4  | 0.32 | 7.76 | 1       | 0.38 | 2.02399 | 2.4081649 | 5127.43 | 0.16 | 29435.53 |
| 15-Sep | 12.0 | Adult-mature  | 48.0 | 2200.00 | 2  | 0.21 | 3.63 | 4455.00 | 0.00 | 2.55858 | 2.5585824 | 2622.53 | 0.00 | 39013.52 |
| 16-Sep | 12.0 | Carcass       | 48.1 | 2161.00 | 0  | 0.20 | 1.93 | 4169.00 | 0.00 | 0.00000 | 0.0000000 | 5345.52 | 0.00 | 39013.52 |

656

**Table 1 continued**  
**Cohort values**

| Date<br>(mo/day) | Temp.<br>(oC) | Stage          | Standing<br>stock of<br>biomass<br>(kJ) | Cohort<br>production<br>lost to<br>mortality<br>kJ | Cohort<br>respiration<br>before dying<br>kJ | Cohort<br>assimilation<br>before dying<br>kJ |
|------------------|---------------|----------------|-----------------------------------------|----------------------------------------------------|---------------------------------------------|----------------------------------------------|
| 15-Sep           | 6             | Egg            | 386.03                                  | 0.00                                               | 0.00                                        | 0.00                                         |
| 15-Jun           | 6.0           | Fry (spring)   | 690.69                                  | 1535.79                                            | 2511.6                                      | 4047.39                                      |
| 15-Aug           | 11.0          | Fry (summer)   | 1825.15                                 | 713.42                                             | 1316.623794                                 | 2030.04                                      |
| 15-Oct           | 9.0           | Fry (fall)     | 3755.26                                 | 1546.30                                            | 3131.982487                                 | 4678.29                                      |
| 15-Feb           | 4.0           | Fry (winter)   | 3228.30                                 | 1753.78                                            | 3868.102532                                 | 5621.89                                      |
| 15-May           | 5.0           | Smolt yearling | 2183.59                                 | 1319.87                                            | 3102.698087                                 | 4422.57                                      |
| 15-Jun           | 11.0          | Smolt yearling | 2195.64                                 | 257.02                                             | 681.9018036                                 | 938.93                                       |
| 15-Jul           | 12.0          | Smolt yearling | 5738.04                                 | 477.72                                             | 1088.681233                                 | 1566.40                                      |
| 15-Aug           | 12.5          | Smolt yearling | 18015.50                                | 1436.05                                            | 2128.900796                                 | 3564.95                                      |
| 15-Sep           | 11.0          | Smolt yearling | 37264.19                                | 3310.00                                            | 3703.907398                                 | 7013.91                                      |
| 15-Oct           | 9.0           | Smolt yearling | 60266.29                                | 5802.26                                            | 5376.71596                                  | 11178.97                                     |
| 15-Nov           | 6.5           | Smolt yearling | 69490.30                                | 7646.08                                            | 6604.313975                                 | 14250.39                                     |
| 15-Dec           | 4.8           | Smolt yearling | 71701.40                                | 8293.05                                            | 7307.319567                                 | 15600.37                                     |
| 15-Jan           | 4.5           | Smolt yearling | 65977.58                                | 8059.68                                            | 7724.674396                                 | 15784.36                                     |
| 15-Feb           | 4.5           | Smolt yearling | 60643.22                                | 7412.10                                            | 7914.886782                                 | 15326.98                                     |
| 15-Mar           | 4.5           | Smolt yearling | 55682.15                                | 6809.22                                            | 8058.131768                                 | 14867.35                                     |
| 15-Apr           | 5.3           | Smolt yearling | 56383.71                                | 6578.69                                            | 8347.156985                                 | 14925.85                                     |
| 15-May           | 7.3           | Smolt yearling | 55035.73                                | 6533.73                                            | 8893.456575                                 | 15427.18                                     |
| 15-Jun           | 9.0           | 2 yr immature  | 54294.69                                | 6413.22                                            | 9711.818069                                 | 16125.04                                     |
| 15-Jul           | 11.0          | 2 yr immature  | 55024.72                                | 6417.62                                            | 10838.90796                                 | 17256.53                                     |
| 15-Aug           | 12.0          | 2 yr immature  | 60212.21                                | 6780.18                                            | 10926.33887                                 | 17706.51                                     |
| 15-Sep           | 11.5          | 2 yr immature  | 65460.64                                | 7392.79                                            | 11117.6938                                  | 18510.48                                     |

|        |      |               |          |         |             |          |
|--------|------|---------------|----------|---------|-------------|----------|
| 15-Oct | 9.3  | 2 yr immature | 71878.52 | 8081.41 | 12033.79686 | 20115.20 |
| 15-Nov | 6.5  | 2 yr immature | 74344.03 | 8589.14 | 12342.04889 | 20931.19 |
| 15-Dec | 5.0  | 2 yr immature | 68888.12 | 8386.47 | 12235.29054 | 20621.76 |
| 15-Jan | 4.5  | 2 yr immature | 63588.21 | 7755.83 | 11903.78294 | 19659.62 |
| 15-Feb | 4.5  | 2 yr immature | 58104.24 | 7122.38 | 11425.72549 | 18548.10 |
| 15-Mar | 4.5  | 2 yr immature | 54917.40 | 6621.44 | 10967.44636 | 17588.88 |
| 15-Apr | 5.0  | 2 yr immature | 51746.79 | 6248.42 | 10655.06793 | 16903.49 |
| 15-May | 7.0  | 3 yr maturing | 53270.57 | 6167.89 | 10642.58165 | 16810.48 |
| 15-Jun | 9.5  | 4 yr maturing | 56555.24 | 6456.11 | 11109.1341  | 17565.24 |
| 15-Jul | 12.5 | Adult-mature  | 65261.62 | 7178.38 | 12049.84547 | 19228.22 |
| 1-Aug  | 13.0 | Adult-mature  | 70505.64 | 8485.44 | 14062.13445 | 22547.58 |
| 15-Sep | 12.0 | Adult-mature  | 8910.00  | 6682.50 | 58520.28    | 65202.78 |
| 16-Sep | 12.0 | Carcass       | 0.00     | 8338.00 | 78027.04    | 86365.04 |

657

658 **Table 2.** Impact of a cohort of Babine Lake sockeye salmon on fresh water and marine ecosystems. This accounting uses the MLT  
 659 (Table 1) to quantify the input of food energy from assimilation (green) and its allocation to biomass production: growth and  
 660 gametes (blue) and respiration (red).

| Ecosystem             | Fresh water |       |       | Marine |        |        | Fresh water<br>Total | Net flow |
|-----------------------|-------------|-------|-------|--------|--------|--------|----------------------|----------|
|                       | Dead        | Alive | Total | Dead   | Alive  | Total  |                      |          |
| Assimilation          | 20800       | 7423  | 28223 | 388016 | 185818 | 573834 | 0                    | 602057   |
| Respiration           | 13931       | 5239  | 19170 | 225790 | 117496 | 343286 | 52284                | 414740   |
| Production            | 6869        | 2184  | 9053  | 162227 | 68322  | 230549 | 0                    | 239602   |
| Imported biomass      |             |       |       |        |        | 2184   | 70506                | 70506    |
| Carcasses             |             |       |       |        |        |        | 17834                | 17834    |
| Clutch                |             |       |       |        |        |        | 386                  | 386      |
| Net flow              | 13738       | 4367  | 18106 | 324454 | 136644 | 461098 | 0                    | 0        |
| Production efficiency | 0.33        | 0.29  | 0.32  | 0.42   | 0.37   | 0.40   | 0.00                 | 0.12     |

661
